# Supplementary material
Source: HighWire-hosted journal article supplement (https://dmd.aspetjournals.org/highwire/filestream/75256/field_highwire_adjunct_files/0/90704_Supplemental_Material.pdf)
Supplement: 90704_Supplemental_Material.pdf [file 90704_Supplemental_Material.pdf]

## *Drug Metabolism and Disposition*

### **The impact of infection and inflammation on drug metabolism, active transport, and systemic drug concentrations in veterinary species**

Marilyn N. Martinez, Jonathan Greene, Leslie Kenna, Lindsey Kissell, and Matt Kuhn

#### **SUPPLEMENTAL MATERIAL: Part 1**

Expansion of information Table 1. Note that the % change values for a parameter was calculated as  $100 * [(disease/control) - 1]$ .

For references associated with Supplement Material Part 1, see the main manuscript.

| Title                                                                                                                           | Author                    | Pathogen                   | Drug          | Method of Drug Administration | Species | Consequence                                                                                                                                                                              | Total or Free Drug | % Change Dis/Healthy AUC | % Change Dis/Healthy Cmax | % Change Dis/Healthy Clearance                                    | % Change Dis/Healthy Vd                                               | % Change Dis/Healthy T½  | Any Tissue measured? If yes, which                            | Tissue Residue Change                                                                                                                                                                                                                                 |
|---------------------------------------------------------------------------------------------------------------------------------|---------------------------|----------------------------|---------------|-------------------------------|---------|------------------------------------------------------------------------------------------------------------------------------------------------------------------------------------------|--------------------|--------------------------|---------------------------|-------------------------------------------------------------------|-----------------------------------------------------------------------|--------------------------|---------------------------------------------------------------|-------------------------------------------------------------------------------------------------------------------------------------------------------------------------------------------------------------------------------------------------------|
| Influence of induced disease states on the disposition kinetics of imidocarb in goats                                           | Abdullah and Baggot, 1986 | <i>LPS, T. evansi, IBR</i> | Imidocarb     | IV                            | Goats   | LPS and IBR reduced Vd and CL. Infection with <i>T. evansi</i> resulted in an increase in Vd and CL.                                                                                     | Total              | Not reported             | NA                        | <i>E. coli</i> (-53%), <i>IBR</i> (-43%) <i>T. evansi</i> (+153%) | <i>E. coli</i> (-54.9%), <i>IBR</i> (-47.8%) <i>T. evansi</i> (+163%) | Change not significant   | NA                                                            | NA                                                                                                                                                                                                                                                    |
| Pharmacokinetics of difloxacin in healthy and <i>E. coli</i> -infected broiler chickens                                         | Abo El-Ela et al., 2014   | <i>E. coli</i>             | Difloxacin    | IV and oral                   | Chicken | Following IV administration, disease resulted in an increase in CL and Vd and a decrease in AUC.                                                                                         | Free               | IV(-46%)<br>Oral (-34%)  | Oral (- 21.6%)            | IV (+73%)                                                         | IV (+195%)                                                            | IV (+31%)<br>Oral (-27%) | NA                                                            | NA                                                                                                                                                                                                                                                    |
| Oxytetracycline concentrations in healthy and diseased calves                                                                   | Ames et al., 1983         | Pneumonia (BVDV)           | OTC           | IV                            | Calves  | Pneumonia resulted in an increase in Vd, half-life and oxytetracycline lung concentrations.                                                                                              | Total              | Not reported             | NA                        | Change not significant                                            | (+55%)                                                                | (+25%)                   | Yes, liver, kidney, and lung                                  | Increased lung residues (+36%), NS change in kidney or liver                                                                                                                                                                                          |
| Effects of trypanosomal infection on the pharmacokinetics of diminazene aceturate in dogs                                       | Anika and Onyeyili        | <i>T. brucei</i>           | Diminazene    | IV                            | Dogs    | Infection with <i>T. brucei</i> resulted in a decrease in Vd and CL                                                                                                                      | Total              | (+25%)                   | NA                        | (-21%)                                                            | (-24%)                                                                | Change not significant   | NA                                                            | NA                                                                                                                                                                                                                                                    |
| Pharmacokinetics of tulathromycin in edible tissues of healthy and experimentally infected pigs with <i>A. pleuropneumoniae</i> | Bladek et al., 2015       | <i>A. pleuropneumoniae</i> | Tulathromycin | IM                            | Swine   | Infection resulted in a change in tulathromycin tissue concentration–time profile, characterized by an increase in elimination half-life and AUC, (plasma concentrations not determined) | Total              | NA                       | NA                        | NA                                                                | NA                                                                    | NA                       | Yes, liver, kidney, muscle, skin with fat, and injection site | Higher concentrations in all tissues, with statistics reported at specific times but not summary parameters. Higher residue (µg/kg) in all tissues of infected calves vs healthy calves at 360 hr (0.0280 vs 0.0014) and at 792 hr (0.0242 vs 0.0007) |

NA = not available, NS = not statistically significant, OTC = oxytetracycline, %Change = 100×[(Infected-Control)/Control], IMM = intramammary infusion.

| Title                                                                                                                                                              | Author               | Pathogen                                 | Drug          | Method of Drug Administration | Species                  | Consequence                                                                        | Total or Free Drug | % Change Dis/Healthy AUC | % Change Dis/Healthy Cmax | % Change Dis/Healthy Clearance | % Change Dis/Healthy Vd | % Change Dis/Healthy T½ | Any Tissue measured? If yes, which | Tissue Residue Change                                               |
|--------------------------------------------------------------------------------------------------------------------------------------------------------------------|----------------------|------------------------------------------|---------------|-------------------------------|--------------------------|------------------------------------------------------------------------------------|--------------------|--------------------------|---------------------------|--------------------------------|-------------------------|-------------------------|------------------------------------|---------------------------------------------------------------------|
| Impact of an experimental ORRSV and <i>Streptococcus suis</i> coinfection on the pharmacokinetics of ceftiofur hydrochloride after intramuscular injection in pigs | Day et al., 2015     | PRRSV and <i>S. suis</i> coinfection     | Ceftiofur     | IM                            | Swine                    | Coinfected pigs had lower AUC and Cmax values, but increased VD and CL values.     | Total              | (-18%)                   | (-23%)                    | (+23%)                         | (+30%)                  | Change not significant  | NA                                 | NA                                                                  |
| Pharmacokinetics of tilmicosin in healthy and experimentally <i>Pasteurella multocida</i> infected lactating goats                                                 | El-Komy et al., 2016 | <i>P. multocida</i>                      | Tilmicosin    | SC                            | Goats lactating          | Infection resulted in a decrease in plasma Cmax, AUC and MRT..                     | Total              | (-31%)                   | (-14%)                    | NA                             | NA                      | Change not significant  | NA                                 | NA                                                                  |
| Pharmacokinetics of Flunixin after intravenous administration in healthy and endotoxaemic rabbits                                                                  | Elmas et al., 2006   | LPS                                      | Flunixin      | IV                            | Rabbit                   | LPS resulted in a decrease in CL and an increase in AUC and half-life.             | Total              | (+44%)                   | NA                        | (-31%)                         | Change not significant  | (+60%)                  | NA                                 | NA                                                                  |
| The influence of Actinobacillus pleuropneumoniae infection on tulathromycin pharmacokinetics and lung tissue disposition in pigs                                   | Gajda et al., 2015   | <i>A. pleuropneumoniae</i>               | Tulathromycin | IM                            | Swine                    | Greater lung tissue AUCs were observed in pneumonic pigs compared to healthy pigs, | Total              | Change not significant   | Change not significant    | NA                             | NA                      | Change not significant  | Yes, lung                          | Greater Lung AUCs (+30%) in pneumonic pigs compared to healthy pigs |
| Altered plasma pharmacokinetics of ceftiofur hydrochloride in cows affected with severe clinical mastitis                                                          | Gorden et al., 2016* | <i>E. coli</i> or <i>Klebsiella</i> spp. | Ceftiofur     | IM                            | Cattle (lactating dairy) | Mastitic cows had significant increases in VD and CL compared to healthy cows.     | Total              | (-45%)                   | (-41%)                    | (+82%)                         | (+114%)                 | Change not significant  | NA                                 | NA                                                                  |

\* Values reported in this table are based upon steady state estimates.

| Title                                                                                                                                                                      | Author                     | Pathogen                                       | Drug                                        | Method of Drug Administration | Species                  | Consequence                                                                                                                                                                                                                                                                                                  | Total or Free Drug | % Change Dis/Healthy AUC             | % Change Dis/Healthy Cmax        | % Change Dis/Healthy Clearance | % Change Dis/Healthy Vd                       | % Change Dis/Healthy T½                                                        | Any Tissue measured? If yes, which | Tissue Residue Change                                                      |
|----------------------------------------------------------------------------------------------------------------------------------------------------------------------------|----------------------------|------------------------------------------------|---------------------------------------------|-------------------------------|--------------------------|--------------------------------------------------------------------------------------------------------------------------------------------------------------------------------------------------------------------------------------------------------------------------------------------------------------|--------------------|--------------------------------------|----------------------------------|--------------------------------|-----------------------------------------------|--------------------------------------------------------------------------------|------------------------------------|----------------------------------------------------------------------------|
| <i>E. coli</i> infection modulates the pharmacokinetics of oral enrofloxacin by targeting P-glycoprotein in small intestine and CYP450 3A in liver and kidney of broilers. | Guo et al., 2014           | <i>E. coli</i>                                 | Enrofloxacin with or without oral verapamil | Oral                          | Chicken                  | By 12 hrs postinfection, significant up-regulation of Abcb1 mRNA in kidney, jejunum and ileum. Expression of Cyp 3a37 mRNA significantly decreased in liver and kidney. Significant decrease in enrofloxacin Cmax and AUC but later Tmax. Disease induced changes in systemic exposure reduced by verapamil. | Total              | w/o verap (-50%)<br>verap (-12%)     | w/o verap (-65%)<br>verap (-30%) | NA                             | Values divided by F so difficult to interpret | w/o verap 24.6 hr vs 3.36 hr<br>w/verap 6.92 hr vs 8.43hr<br>infect vs healthy | NA                                 | NA                                                                         |
| Elimination kinetics of ceftiofur hydrochloride in milk after an 8-day extended intramammary administration in healthy and infected cows.                                  | Han et al., 2017           | <i>S. aureus</i>                               | Ceftiofur                                   | IMM                           | Cattle (lactating dairy) | No differences in serum or milk PK                                                                                                                                                                                                                                                                           | Total              | Change not significant               | Change not significant           | NA                             | NA                                            | Change not significant                                                         | Yes, milk                          | Quarter production efficiency but not disease influences drug conc in milk |
| Pharmacokinetic-pharmacodynamic indices of enrofloxacin in <i>E. coli</i> O78/H12 infected chickens                                                                        | Haritova et al., 2011      | <i>E. coli</i>                                 | Enrofloxacin                                | Oral                          | Chicken                  | Mdr1 mRNA expression was significantly decreased in infected animals but was partially restored with 5 days of oral danofloxacin or enrofloxacin treatment. No blood PK samples were collected.                                                                                                              | NA                 | NA                                   | NA                               | NA                             | NA                                            | NA                                                                             | NA                                 | NA                                                                         |
| Comparative kinetic disposition of oxfendazole in sheep and goats before and during infection with <i>Haemonchus contortus</i> and <i>Trichostrongylus colubriformis</i>   | Hennessy et al., 1993      | <i>H. contortus</i><br><i>T. colubriformis</i> | <sup>14</sup> C-Oxfendazole (OFZ)           | Intra-ruminal                 | Sheep and Goats          | NC PK of fenbendazole (FBZ) or FBZ-SO <sub>2</sub> , but significant decrease in OFZ Cmax and AUC in both species                                                                                                                                                                                            | Free               | OZF Sheep (-32%)<br>Goats (-59%)     | OZF Sheep (-26%)<br>Goats (-99%) | NA                             | NA                                            | Change not significant in either species                                       | NA                                 | NA                                                                         |
| Comparative pharmacokinetics of marbofloxacin in healthy and <i>Mannheimia haemolytica</i> infected calves                                                                 | Ismail and El-Kattan, 2007 | <i>M. haemolytica</i>                          | Marbofloxacin                               | IM and IV                     | Calves                   | Infection resulted in a decrease in CL (IV), and an increase in half-life (IM and IV), AUC (IM and IV) and Cmax (IM). There were no changes to protein binding.                                                                                                                                              | Total              | IM route (+112%)<br>IV route (+113%) | (+66%)                           | IV route (-57%)                | Change not significant                        | IM route (+70%)<br>IV route (+78%)                                             | NA                                 | NA                                                                         |

| Title                                                                                                                                            | Author                      | Pathogen                                             | Drug                                                            | Method of Drug Administration | Species | Consequence                                                                                                                                                               | Total or Free Drug | % Change Dis/Healthy AUC                                                        | % Change Dis/Healthy Cmax | % Change Dis/Healthy Clearance | % Change Dis/Healthy Vd | % Change Dis/Healthy T½ | Any Tissue measured? If yes, which | Tissue Residue Change                                                                                                                                              |
|--------------------------------------------------------------------------------------------------------------------------------------------------|-----------------------------|------------------------------------------------------|-----------------------------------------------------------------|-------------------------------|---------|---------------------------------------------------------------------------------------------------------------------------------------------------------------------------|--------------------|---------------------------------------------------------------------------------|---------------------------|--------------------------------|-------------------------|-------------------------|------------------------------------|--------------------------------------------------------------------------------------------------------------------------------------------------------------------|
| Effect of <i>Haemonchus contortus</i> infection on the clearance of antipyrine, sulfobromophthalein, chloramphenicol, and sulfathiazole in lambs | Kawalek and Fetterer, 1990* | <i>H. contortus</i>                                  | Antipyrine, sulfobromophthalein, chloramphenicol, sulfathiazole | IV                            | Lambs   | Clearance of sulfobromophthalein and sulfathiazole was unaffected by infection. CL and VD of antipyrine were increased by infection.                                      | Total              | Decreased** Sulfathiazole (-32%)<br>Antipyrine (-59%)<br>Chloramphenicol (-29%) | NA                        | Antipyrine (+84%)              | Antipyrine (+12%)       | Antipyrine (-31%)       | NA                                 | NA                                                                                                                                                                 |
| Comparison of pharmacokinetics and milk elimination of flunixin in healthy cows and cows with mastitis                                           | Kissell et al., 2015        | Mastitis ( <i>E. coli</i> or <i>Klebsiella spp</i> ) | Flunixin                                                        | IV                            | Bovine  | Mastitis resulted in a substantial decrease in CL and increase in milk parent flunixin concentrations                                                                     | Total              | (+117%)                                                                         | NA                        | (-44%)                         | Change not significant  | Change not significant  | Yes                                | Marked profile change: metabolite -59% (hr 2), -53% (hrs 12). Mean flunixin conc in milk below 20 ng/mL at 36 hrs in controls and 13.02 at hr 60 in mastitic cows. |
| Plasma pharmacokinetics and milk levels of ceftriaxone following single intravenous administration in healthy and endometritic cows              | Kumar et al., 2010***       | Endometritis (unknown)                               | Ceftriaxone                                                     | IV                            | Bovine  | Based upon mean values (no statistical analysis indicated), endometritis was associated with decreased AUC, increase in CL, increase in Vd, and therefore increase in T½. | Total              | (-41%)                                                                          | NA                        | (+87%)                         | (+210%)                 | (53%)                   | Yes, milk                          | Milk drug concentrations were highly variable in control and diseased cows and therefore difficult to compare. Both groups not detected by 48 hrs postdose         |

\* Drugs not mentioned had changes that were not statistically significant. \*\* Comparisons based upon pre-infection and during infection. It is unclear how after an IV dose, significant differences in AUC could be identified without concomitant significant changes in CL. Parameter and drug values not indicated above imply a lack of statistical significance. \*\*\* Although we indicate changes, note that statistical analysis not provided in the manuscript by Kumar et al. (2010).

| Title                                                                                                                                                                                                  | Author               | Pathogen                                                                                                                       | Drug                                                                     | Method of Drug Administration | Species | Consequence                                                                                                                                                                                                                                                                                                                                                                                                                                                                                                                                                                                                                                                                                                      | Total or Free Drug | % Change Dis/Healthy AUC                                                                                                                                                              | % Change Dis/Healthy Cmax                                                                                                                                                            | % Change Dis/Healthy Clearance | % Change Dis/Healthy Vd | % Change Dis/Healthy T½    | Any Tissue measured? If yes, which | Tissue Residue Change                                                                                      |
|--------------------------------------------------------------------------------------------------------------------------------------------------------------------------------------------------------|----------------------|--------------------------------------------------------------------------------------------------------------------------------|--------------------------------------------------------------------------|-------------------------------|---------|------------------------------------------------------------------------------------------------------------------------------------------------------------------------------------------------------------------------------------------------------------------------------------------------------------------------------------------------------------------------------------------------------------------------------------------------------------------------------------------------------------------------------------------------------------------------------------------------------------------------------------------------------------------------------------------------------------------|--------------------|---------------------------------------------------------------------------------------------------------------------------------------------------------------------------------------|--------------------------------------------------------------------------------------------------------------------------------------------------------------------------------------|--------------------------------|-------------------------|----------------------------|------------------------------------|------------------------------------------------------------------------------------------------------------|
| The influence of a heavy infection with sensitive and resistant strains of <i>Ostertagia circumcincta</i> and with <i>Trichostrongylus colubriformis</i> on the pharmacokinetics of febantel on lambs. | Landuyt et al., 1995 | <b>G1:</b> susceptible <i>O. circumcincta</i> ), <b>G2:</b> <i>T. colubriformis</i> ; <b>G3:</b> Resist <i>O. circumcincta</i> | Febantel (sequential administration, first healthy then after infection) | Oral                          | Lambs   | <u>Statistics not provided:</u> Based upon means, PK changes were dependent on nature of parasite infection. In all cases, there were similar decreases in active metabolites. Primary parasite-associated difference was in impact on Cmax values. Rate but not extent of exposures differed between susceptible and resistant strains of <i>O. circumcincta</i> .                                                                                                                                                                                                                                                                                                                                              | Total              | <b>G1:</b> FBZ -25%<br>OXF -11%<br>FBZSO <sub>2</sub> -7%;<br><b>G2:</b> FBZ -34%<br>OXF -13%<br>FBZSO <sub>2</sub> +9%<br><b>G3:</b> FBZ -13%<br>OXF -21%<br>FBZSO <sub>2</sub> -33% | <b>G1:</b> FBZ +57%<br>OXF+24%<br>FBZSO <sub>2</sub> +54%;<br><b>G2:</b> FBZ +3%<br>OXF -26%<br>FBZSO <sub>2</sub> -33%<br><b>G3:</b> FBZ +5%<br>OXF -14%<br>FBZSO <sub>2</sub> -19% | NA                             | NA                      | NA                         | NA                                 | NA                                                                                                         |
| The influence of parasitism on the pharmacokinetics of moxidectin in lambs.                                                                                                                            | Lespine et al., 2004 | <i>H. contortus</i> and <i>T. colubriformis</i> mix (natural infections)                                                       | Moxidectin                                                               | SC and oral                   | Lambs   | Ignoring inferential statistics (because of high variability and small n per condition), we can at best focus on relative changes in means. From this, we see an increase in mean CL/F, decrease in mean residence time, decrease in T1/2, and a decrease in AUC as a function of disease across both routes. Mean Cmax decreased as a function of disease following oral but increased following SC administration. Tmax was unchanged as a result of disease following oral administration but increased following SC administration. However, given the variability and small sample size, it is equally possible that the apparent changes are within the normal level of variability for some PK parameters | Total              | SC (-53%)<br>Oral (-45%)                                                                                                                                                              | SC (+52%)<br>PO (-29%)                                                                                                                                                               | SC (+81%)<br>PO (+73%)         | NA                      | MRT SC (-66%)<br>PO (-63%) | NA                                 | NA                                                                                                         |
| Pharmacodynamics and pharmacokinetics of carprofen, a non-steroidal anti-inflammatory drug, in healthy cows and cows with <i>E. coli</i> endotoxin-induced mastitis                                    | Lohuis et al., 1991  | LPS                                                                                                                            | Carprofen                                                                | IV                            | Bovine  | Mastitis resulted in a reduction in carprofen CL, an increase in half-life and greater excretion of carprofen into milk.                                                                                                                                                                                                                                                                                                                                                                                                                                                                                                                                                                                         | Total              | (+72%)                                                                                                                                                                                | NA                                                                                                                                                                                   | (-42%)                         | Change not significant  | (+40%)                     | Yes                                | Not detected in milk of healthy cows but detected for more than 45 hrs after IV injection in mastitic cows |

| Title                                                                                                                                                      | Author                | Pathogen                                         | Drug                              | Method of Drug Administration                   | Species | Consequence                                                                                                                                                                                  | Total or Free Drug | % Change Dis/Healthy AUC                                                      | % Change Dis/Healthy C <sub>max</sub>                                                                   | % Change Dis/Healthy Clearance | % Change Dis/Healthy V <sub>d</sub>                          | % Change Dis/Healthy T <sub>1/2</sub>                        | Any Tissue measured? If yes, which | Tissue Residue Change |
|------------------------------------------------------------------------------------------------------------------------------------------------------------|-----------------------|--------------------------------------------------|-----------------------------------|-------------------------------------------------|---------|----------------------------------------------------------------------------------------------------------------------------------------------------------------------------------------------|--------------------|-------------------------------------------------------------------------------|---------------------------------------------------------------------------------------------------------|--------------------------------|--------------------------------------------------------------|--------------------------------------------------------------|------------------------------------|-----------------------|
| Comparative pharmacokinetics of diminazene in noninfected Boran ( <i>Bos indicus</i> ) cattle and Boran cattle infected with <i>Trypanosoma congolense</i> | Mamman et al., 1993   | <i>Trypanosoma congolense</i>                    | Diminazene                        | IM                                              | Cattle  | Drug PK of each animal was determined before and during acute and chronic phases of infection. Infection influenced absorption kinetics and volume of distribution but not drug elimination. | Total              | Effectively unchanged                                                         | (+73% ) for acute, but nearly back to control state in chronic infection                                | Effectively unchanged          | (-26% ) during acute phase but similar to control in chronic | Primary effect was the greater variability in infected cows. | NA                                 | NA                    |
| Effect of parasitism with <i>Ostertagia circumcincta</i> on pharmacokinetics of fenbendazole in sheep                                                      | Marriner et al., 1985 | <i>Ostertagia circumcincta</i>                   | Fenbendazole                      | Oral first to infect then same sheep as control | Sheep   | Consistently lower blood levels of fenbendazole and its metabolites when animals were infected. This was accompanied by lower drug and metabolite exposures in the abomasum.                 | Total              | Plasma: FBZ (-23%)<br>OxFBZ (-44%)<br><br>Abomasum FBZ (-38%)<br>OxFBZ (-67%) | Plasma: FBZ (-38%)<br>OxFBZ (-52%)                                                                      | NA                             | NA                                                           | NA                                                           | NA                                 | NA                    |
| Effect of parasitism with <i>Nematodirus battus</i> on the pharmacokinetics of levamisole, ivermectin and netobimin                                        | McKellar et al., 1991 | <i>Nematodirus battus</i>                        | levamisole, Ivermectin, netobimin | Oral and SC                                     | Lambs   | No significant differences in PK.                                                                                                                                                            | Total              | (see note 1 at end of this appendix).                                         | Large variations led to inconsistent results, with varying degrees of difference reported (see note 1). | NA                             | NA                                                           | NA                                                           | NA                                 | NA                    |
| Effect of Parasitism on the Pharmacokinetic Disposition of Ivermectin in Lambs                                                                             | Perez et al., 2006    | <i>Ostertagia, Trichostrongylus Cooperia</i> mix | Ivermectin                        | SC                                              | Lambs   | Parasite infection resulted in a decrease in AUC. CL and VD were not reported                                                                                                                | Total              | (-44%)                                                                        | Change not significant                                                                                  | NA                             | NA                                                           | Change not significant                                       | NA                                 | NA                    |
| Pharmacokinetics of florfenicol after intravenous administration in <i>E. coli</i> lipopolysaccharide-induced endotoxaemic sheep                           | Perez et al., 2014    | LPS                                              | Florfenicol                       | IV                                              | Sheep   | Endotoxemia resulted in higher florfenicol plasma concentrations due to a decrease in CL.                                                                                                    | Total              | (+35%)                                                                        | NA                                                                                                      | (-23%)                         | Change not significant                                       | (+63%)                                                       | NA                                 | NA                    |
| The pharmacokinetics of oxytetracycline following intravenous administration in healthy and diseased pigs                                                  | Pijpers et al., 1990  | <i>A. pleuropneumoniae</i>                       | OTC                               | IV                                              | Swine   | In diseased pigs, CL, V <sub>d</sub> and T <sub>1/2</sub> were significantly decreased when dosed at 10 mg/kg but not different when dosed at 50 mg/kg. Values in table from 10 mg/kg dose   | Total              | (+12%)                                                                        | NA                                                                                                      | (-11%)                         | (-22%)                                                       | (-13%)                                                       | NA                                 | NA                    |

| Title                                                                                                                                                                         | Author               | Pathogen                   | Drug                                            | Method of Drug Administration | Species | Consequence                                                                                                                                                                                                        | Total or Free Drug | % Change Dis/Healthy AUC                                                            | % Change Dis/Healthy Cmax | % Change Dis/Healthy Clearance                                                       | % Change Dis/Healthy Vd                                                     | % Change Dis/Healthy T½                                                               | Any Tissue measured? If yes, which | Tissue Residue Change |
|-------------------------------------------------------------------------------------------------------------------------------------------------------------------------------|----------------------|----------------------------|-------------------------------------------------|-------------------------------|---------|--------------------------------------------------------------------------------------------------------------------------------------------------------------------------------------------------------------------|--------------------|-------------------------------------------------------------------------------------|---------------------------|--------------------------------------------------------------------------------------|-----------------------------------------------------------------------------|---------------------------------------------------------------------------------------|------------------------------------|-----------------------|
| The influence of disease on feed and water consumption and on pharmacokinetics of orally administered oxytetracycline in pigs                                                 | Pijpers et al., 1991 | <i>A. pleuropneumoniae</i> | OTC                                             | Oral                          | Swine   | In diseased pigs, CL/F was significantly reduce resulting in an increase in AUC and T½.                                                                                                                            | Total              | (+91%)                                                                              | (-53%)                    | (-63%)                                                                               | NA                                                                          | (+138%)                                                                               | NA                                 | NA                    |
| Influence of porcine <i>A. pleuropneumoniae</i> infection and dexamethasone on the pharmacokinetic parameters of enrofloxacin                                                 | Post et al., 2002    | <i>A. pleuropneumoniae</i> | Enrofloxacin                                    | IV                            | Swine   | Disease resulted in a decrease in Vd and half-life, but CL was unaffected. APP did not affect the metabolism of enrofloxacin to ciprofloxacin.                                                                     | Total              | Change not significant                                                              | NA                        | Change not significant                                                               | (-50%)                                                                      | (-32%)                                                                                | NA                                 | NA                    |
| The effect of endotoxin and dexamethasone on enrofloxacin pharmacokinetic parameters in swine                                                                                 | Post et al., 2003    | LPS                        | Enrofloxacin                                    | IV                            | Swine   | Administration of LPS was associated with a decrease in enrofloxacin CL and an increase in AUC and T½.                                                                                                             | Total              | (+100%)                                                                             | NA                        | (-50%)                                                                               | Change not significant                                                      | (+54%)                                                                                | NA                                 | NA                    |
| Effects of endotoxin-induced fever and probenecid on disposition of enrofloxacin and its metabolite ciprofloxacin after intravascular administration of enrofloxacin in goats | Rao et al., 2000     | <i>E. coli</i>             | Enrofloxacin                                    | IV                            | Goat    | Disease reduced the CL of enrofloxacin resulting in an increase in AUC and half-life. Ciprofloxacin plasma concentrations were decreased and T½ was increased.                                                     | Total              | Enrofloxacin (+74%)<br>Ciprofloxacin (-46%)                                         | Ciprofloxacin (-60%)      | Enrofloxacin (-46%)                                                                  | Change not significant                                                      | Enrofloxacin (+62%)<br>Ciprofloxacin (+53%)                                           | NA                                 | NA                    |
| The impact of acute phase response on the plasma clearance of antipyrine, theophylline, phenytoin and nifedipine in rabbits                                                   | Saitoh et al., 2000  | LPS                        | Antipyrine, theophylline, phenytoin, nifedipine | IV                            | Rabbits | Decreases CL for antipyrine, theophylline, phenytoin, and nifedipine in infected animals. An increase in Vd was observed for phenytoin and nifedipine. The T½ for all the drugs was increased in diseased animals. | Total              | Antipyrine (+30%),<br>Theophylline (+89%),<br>Phenytoin (78%),<br>Nifedipine (+22%) | NA                        | Antipyrine (-23%),<br>Theophylline (-46%),<br>Phenytoin (-42%),<br>Nifedipine (-19%) | Phenytoin (+32%),<br>Nifedipine (+44%)<br>Other drugs no significant change | Antipyrine (+20%),<br>Theophylline (+158%),<br>Phenytoin (+95%),<br>Nifedipine (+54%) | No                                 | NA                    |



| Title                                                                                                                     | Author                   | Pathogen                                                           | Drug          | Method of Drug Administration | Species | Consequence                                                                                                                                                                                                                                                                                                                                                                                                 | Total or Free Drug | % Change Dis/Healthy AUC                                                  | % Change Dis/Healthy Cmax | % Change Dis/Healthy Clearance                                         | % Change Dis/Healthy Vd                                                | % Change Dis/Healthy T½                                                                | Any Tissue measured? If yes, which                                                     | Tissue Residue Change                                                                                                                                                                                                                                         |
|---------------------------------------------------------------------------------------------------------------------------|--------------------------|--------------------------------------------------------------------|---------------|-------------------------------|---------|-------------------------------------------------------------------------------------------------------------------------------------------------------------------------------------------------------------------------------------------------------------------------------------------------------------------------------------------------------------------------------------------------------------|--------------------|---------------------------------------------------------------------------|---------------------------|------------------------------------------------------------------------|------------------------------------------------------------------------|----------------------------------------------------------------------------------------|----------------------------------------------------------------------------------------|---------------------------------------------------------------------------------------------------------------------------------------------------------------------------------------------------------------------------------------------------------------|
| Tissue distribution and disposition kinetics of enrofloxacin in healthy and <i>E. coli</i> infected broilers              | Soliman, 2000            | <i>E. coli</i>                                                     | Enrofloxacin  | IV and oral                   | Chicken | Following IV administration, the CL significantly increased, AUC and T½ significantly decreased but the increase in Vd was not statistically significant when comparing healthy versus diseased chickens. Nine days post-dose enrofloxacin breast muscle concentrations were significantly greater in infected birds. There were no other differences in the other tissues assayed or at other time points. | Total              | IV (-34%)<br>Oral (-32%)                                                  | Oral (-16%)               | IV (+51%)                                                              | Change not significant                                                 | IV (-24%)<br>Oral (-32%)                                                               | Yes, liver, kidney, spleen, lung, heart, brain, breast muscle, thigh muscle, fat, skin | Enrofloxacin tissue concentrations were similar between healthy and infected birds at all time points and tissues, except nine days after the last dose, where enrofloxacin in breast muscle was significantly greater in infected birds compared to healthy. |
| Pharmacokinetics and efficacy of tilmicosin in the treatment of <i>Pasteurella haemolytica</i> bronchopneumonia in calves | Soliman and Ayad, 2014   | <i>P. haemolytica</i>                                              | Tilmicosin    | IV and SC                     | Calves  | Following IV administration, CL and Vd were significantly decreased in diseased calves.                                                                                                                                                                                                                                                                                                                     | Free               | IV (+13%)                                                                 | NA                        | IV (-14%)                                                              | IV (-9%)                                                               | Change not significant                                                                 | NA                                                                                     | NA                                                                                                                                                                                                                                                            |
| Pharmacokinetics of ceftiofur hydrochloride in pigs infected with porcine reproductive and respiratory syndrome virus     | Tantivanont et al., 2009 | PRRSV                                                              | Ceftiofur     | IM                            | Swine   | PRRSV infection resulted in an increase in CL and VD and a decrease in AUC, Cmax and T½.                                                                                                                                                                                                                                                                                                                    | Total              | (-70%)                                                                    | (-53%)                    | (+240%)                                                                | (+116%)                                                                | (-38%)                                                                                 | NA                                                                                     | NA                                                                                                                                                                                                                                                            |
| Effect of tick-borne fever and trypanosomiasis on the pharmacokinetics of sulfadimidine and its metabolites in goats      | Van Gogh et al., 1989    | <i>Ehrlichia phagocytophila</i> and <i>Trypanosoma brucei</i> 1066 | Sulfadimidine | IV                            | Goats   | Parasitic infection resulted in a decrease in CL and increase in AUC and MRT. For Vd, decrease seen after 20 mg/kg but not the 200 mg/kg dose                                                                                                                                                                                                                                                               | Total              | 200 mg/kg - <i>E. phagocytophila</i> (+142%),<br><i>T. brucei</i> (+209%) | NA                        | 20 mg/kg - <i>E. phagocytophila</i> (-68%),<br><i>T. brucei</i> (-38%) | 20 mg/kg - <i>E. phagocytophila</i> (-18%),<br><i>T. brucei</i> (-27%) | 20 mg/kg - <i>E. phagocytophila</i> (+224%)<br><i>T. brucei</i> Change not significant | NA                                                                                     | NA                                                                                                                                                                                                                                                            |

| Title                                                                                                                                                    | Author              | Pathogen           | Drug          | Method of Drug Administration | Species | Consequence                                                                                            | Total or Free Drug | % Change Dis/Healthy AUC | % Change Dis/Healthy Cmax | % Change Dis/Healthy Clearance | % Change Dis/Healthy Vd | % Change Dis/Healthy T½ | Any Tissue measured? If yes, which | Tissue Residue Change |
|----------------------------------------------------------------------------------------------------------------------------------------------------------|---------------------|--------------------|---------------|-------------------------------|---------|--------------------------------------------------------------------------------------------------------|--------------------|--------------------------|---------------------------|--------------------------------|-------------------------|-------------------------|------------------------------------|-----------------------|
| Influence of <i>Escherichia coli</i> endotoxin-induced fever on the pharmacokinetic behavior of marbofloxacin after intravenous administration in goats. | Waxman et al., 2003 | <i>E. coli</i>     | Marbofloxacin | IV                            | Goat    | Disease resulted in a decrease in CL and VD and an increase in AUC,                                    | Total              | (+90%)                   | NA                        | (-45%)                         | (-39%)                  | Change not significant  | NA                                 | NA                    |
| Pharmacokinetics of tilimicosin in healthy pigs and in pigs experimentally infected with <i>Haemophilus parasuis</i>                                     | Zhang et al., 2017  | <i>H. parasuis</i> | Tilmicosin    | Oral                          | Swine   | No significant differences in tilimicosin pharmacokinetics were observed in healthy and infected pigs. | Total              | Change not significant   | NA                        | Change not significant         | Change not significant  | Change not significant  | NA                                 | NA                    |

**Note 1: Additional detailed information from McKellar et al., 1991**

|          | ORAL   |       |         |       |        |         |
|----------|--------|-------|---------|-------|--------|---------|
|          | AUC    |       |         | Cmax  |        |         |
|          | Lev    | IVM   | Net 7.5 | Lev   | IVM    | Net 7.5 |
| Healthy  | 6.2    | 1.49  | 15.23   | 0.84  | 0.029  | 1.14    |
| Diseased | 5.38   | 2.13  | 16.49   | 0.82  | 0.021  | 1.21    |
|          |        |       |         |       |        |         |
| %change  | -13.23 | 42.95 | 8.27    | -2.38 | -27.59 |         |
|          | SC     |       |         |       |        |         |
|          | AUC    |       |         | Cmax  |        |         |
|          | Lev    | IVM   | Net 7.5 | Lev   | IVM    | Net 7.5 |
| Healthy  | 4.66   | 2.44  | 0.28    | 1.41  | 0.03   | 0.17    |
| Diseased | 5.97   | 4.2   | 1.65    | 1.67  | 0.035  | 0.03    |
|          |        |       |         |       |        |         |
| %change  | 28.11  | 72.13 | 489.29  | 18.44 | 16.67  | -82.35  |

## SUPPLEMENTAL MATERIAL: Part 2 (references at end of Part 2)

### SUMMARY OF MECHANISMS OF PK METABOLISM AND TRANSPORTER CHANGES OBSERVED IN VETERINARY SPECIES:

#### **Description of Methods**

The following description of methods serves as a key to the “Marker for Evaluation” column in Table 2. The letter associated with each method in Table 2 corresponds to a method described below.

#### **(A) Total CYP**

Difference spectroscopy, a method for quantifying cytochrome CYP content in a sample, compares the sample's absorption spectra before and after an intervention. The resulting difference spectrum is a signature of the molecule. The spectral signal is converted into a concentration using the extinction coefficient of the medium. CYP was originally identified as a pigment in liver microsomes that produces a spectrum with a wavelength maximum at 450 nm when bound to carbon monoxide (Klingenberg, 1958; Garfinkel, 1958). Omura and Sato (1962, 1964 a,b) further developed this method and characterized the enzyme in greater detail.

#### **(B) Metabolic Activity**

##### **(1) CYP Activity / Monooxygenase assays**

Cytochrome CYP isoforms may be characterized by their activity toward high-affinity substrates. Catalytic activity is monitored via the concentration of marker metabolite(s) generated per mg protein in microsomal preparations over a period of time.

## SUPPLEMENTAL MATERIAL: Part 2

### SUMMARY OF MECHANISMS OF PK METABOLISM AND TRANSPORTER CHANGES OBSERVED IN VETERINARY SPECIES:

The following table lists substrates used in the publications reviewed here and their associated CYP isoforms.

Note: These are human probes/markers.

| <b>Probe Molecule</b> | <b>Reaction</b>       | <b>Cytochrome CYP Isoform</b>              |
|-----------------------|-----------------------|--------------------------------------------|
| 7-Ethoxyresorufin     | O-deethylation        | 1A1 (Bourrié et al., 1996)                 |
| Phenacetin            | O-deethylation        | 1A2 (Bourrié et al., 1996)                 |
| Caffeine              | N-3-demethylation     | 1A2 (Kot and Daniel, 2008)                 |
| Coumarin              | 7-hydroxylation       | 2A6 (Bourrié et al., 1996)                 |
| Pentoxyresorufin      | O-depentylation       | 2B (Nakajima et al., 1990)                 |
| Tolbutamide           | 4-methylhydroxylation | 2C9 (Bourrié et al., 1996)                 |
| Aminopyrine           | N-demethylation       | 2C8 (Niwa T and Imagawa Y, 2016)           |
| Dextromethorphan      | O-demethylation       | 2D6 (Bourrié et al., 1996) (In Dogs: 2D15) |
| Aniline               | 4-hydroxylation       | 2E1 (Bourrié et al., 1996)                 |
| Chlorzoxazone         | Hydroxylase           | 2E1 (Peter et al., 1990)                   |
| Nifedipine            | Dehydrogenation       | 3A4 (Bourrié et al., 1996)                 |
| Testosterone          | Hydroxylation         | 3A4 (Krauser et al., 2004)                 |

## SUPPLEMENTAL MATERIAL: Part 2

### SUMMARY OF MECHANISMS OF PK METABOLISM AND TRANSPORTER CHANGES OBSERVED IN VETERINARY SPECIES:

Antipyrine is a general marker of CYP activity. Antipyrine is not a probe for specific cytochrome CYP enzymes because it is metabolized by at least six hepatic cytochrome CYP enzymes: CYP1A2, CYP2B6, CYP2C8, CYP2C9, CYP2C18, and CYP3A4 (Engel et al., 1996).

Similarly, 4-nitroanisole (synonym: p-nitroanisole) is metabolized by at least two cytochrome CYP isoforms: CYP2A6 and CYP2E1 (Jones and Tyman, 1997).

Theophylline probes the activity of CYP 1A2 and CYP 2E1 (Thorn, 2012).  
Phenytoin is metabolized by CYP 2C9 and CYP 2C19 (Thorn et al., 2012).

7-ethoxycoumarin is metabolized by CYP 1A2 and CYP 2E1 (Yamazaki H et al., 1996).

7-methoxy-4-trifluoromethyl coumarin was initially thought to be a specific probe for CYP 2C9, but has been shown to be metabolized by CYP2A6, CYP2B6, CYP2C9, CYP2C19, CYP2E1, and CYP3A4 (Porrogi et al., 2008).

Ethylmorphine is metabolized by CYP2D6 and CYP3A4 (Liu et al., 1995).

## SUPPLEMENTAL MATERIAL: Part 2

### SUMMARY OF MECHANISMS OF PK METABOLISM AND TRANSPORTER CHANGES OBSERVED IN VETERINARY SPECIES:

#### (2) UDP-Glucuronyltransferase activity

UDP-Glucuronyltransferase activity was measured by assaying the glucuronidation rates of 1-naphthol, morphine, chloramphenicol, and paracetamol.

#### (C) RNA Hybridization

The dot hybridization method separates RNA without using electrophoresis. RNA samples are spotted onto a matrix and hybridized to cDNA probes (White and Bancroft, 1982).

#### (D) Cytokine assays

Cytokines are signaling molecules of the immune system; a change in their concentration indicates an immune response to stimulus.

IL-6 is a cytokine that often acts as a growth factor, therefore, one assay for IL-6 measures cellular proliferation. IL-6 is essential for hybridoma growth and monitoring hybridoma cell growth after exposure to IL-6 provides information about the concentration of IL-6. A murine hybridoma cell line (B9) which is sensitive to IL-6 was used to quantify IL-6 in serum samples.

Tumor necrosis factor alpha (TNF $\alpha$ ) causes cell death, thus, one assay for TNF $\alpha$  concentration measures cell killing. A murine fibrosarcoma cell line, WEHI 164 clone 13, was used to determine TNF $\alpha$  in serum samples. TNF mediates high cytotoxicity towards WEHI 164 clone 13 cells. The high sensitivity of WEHI 164 clone 13 cells to TNF has made it possible to detect TNF in different biological fluids where the TNF concentration is very low.

## SUPPLEMENTAL MATERIAL: Part 2

### SUMMARY OF MECHANISMS OF PK METABOLISM AND TRANSPORTER CHANGES OBSERVED IN VETERINARY SPECIES:

#### (E) Western Blot

The Western Blot assay is a method for determining protein sequence. First, protein fragments are separated by electrophoresis. Then the separated protein fragments are transferred to a filter membrane and detection by probe hybridization.

#### (F) Plasma concentration

Drug concentration in plasma was determined using a high-performance liquid chromatography (HPLC) method.

#### (G) Liver tissue activity / microsomes

Metabolism was studied by incubating substrates of interest with the 9000 × g supernatant fraction from liver tissue.

#### (H) Quantitative Polymerase Chain Reaction (qPCR)

Quantitative PCR, also referred to real-time PCR, monitors the amplification of a targeted DNA molecule during PCR, i.e. in real-time, and not at its end, as in conventional PCR. Monitoring occurs in real time by incorporating fluorescent labels in the DNA. RNA is amplified with single stranded cDNA molecules.

## SUPPLEMENTAL MATERIAL: Part 2

### SUMMARY OF MECHANISMS OF PK METABOLISM AND TRANSPORTER CHANGES OBSERVED IN VETERINARY SPECIES:

#### (I) Immunohistochemistry for P-glycoprotein (P-gp)

Tissue was incubated overnight with an antibody to P-glycoprotein at 37°C for 1 hour with the secondary antibody. P-gp immunoreactivity was visualized with 3,3'-Diaminobenzidine staining. Sections that were not incubated with the primary antibody served as negative controls.

#### (J) RNA-Seq Analysis

This is a method of screening a transcriptome for upregulated genes, with the aim of relating the impact of a disease state on gene expression. In this case, the disease was mycotoxin-induced stress. The workflow was to extract RNA from a sample and sequence it. Sequences were mapped to genes. Those gene counts were normalized and compared between conditions to generate a list of differentially-expressed genes (DEGs). DEGs were mapped to pathway annotations and pathways enriched for DEGs were selected.



## References

Bourrié M, Meunier V, Berger Y, and Fabre G (1996) Cytochrome CYP isoform inhibitors as a tool for the investigation of metabolic reactions catalyzed by human liver microsomes. *J Pharmacol Exp Ther* **277**: 321-332.

Engel G, Hofmann U, Heidemann H, Cosme J, and Eichelbaum M (1996) Antipyrine as a probe for human oxidative drug metabolism: identification of the cytochrome CYP enzymes catalyzing 4-hydroxyantipyrine, 3-hydroxymethylantipyrine, and norantipyrine formation. *Clin Pharmacol Ther* **59**: 613-623.

Garfinkel D (1958) Studies on pig liver microsomes. I. Enzymic and pigment composition of different microsomal fractions. *Arch Biochem Biophys* **77**:493–509.

Jones BC, Tyman CA, and Smith DA (1997) Identification of the cytochrome CYP isoforms involved in the O-demethylation of 4-nitroanisole in human liver microsomes. *Xenobiotica* **27**: 1025-1037.

Krauser JA, Voehler M., Tseng LH, Schefer AB, Godejohann M, and Guengerich FP (2004) Testosterone 1 $\beta$ -hydroxylation by human cytochrome CYP 3A4. *Eur J Biochem* **271**: 3962–3969.

-

Klingenberg M (1958) Pigments of rat liver microsomes. *Arch Biochem Biophys* **75**: 376–386.

Kot M and Daniel WA (2008) Caffeine as a marker substrate for testing cytochrome CYP activity in human and rat. *Pharmacol Rep* **60**: 789-797.

## References

Liu Z, Mortimer O, Smith CA, Wolf CR, and Rane A (1995) Evidence for a role of cytochrome CYP 2D6 and 3A4 in ethylmorphine metabolism. *Br J Clin Pharmacol* **39**: 77-80.

Nakajima T, Elovaara E, Park SS, Gelboin HV, Hietanen E, and Vainio H (1990) Monoclonal antibody-directed characterization of benzene, ethoxyresorufin and pentoxyresorufin metabolism in rat liver microsomes. *Biochem Pharmacol* **40**: 1255-1261.

Niwa T and Imagawa Y (2016) Substrate specificity of human cytochrome CYP (CYP) 2C subfamily and effect of azole antifungal agents on CYP2C8. *J Pharm Pharm Sci* **19**: 423–429.

Omura T and Sato R (1962) A new cytochrome in liver microsomes. *J Biol Chem* **237**: 1375–1376.

Omura T and Sato R (1964a) The carbon monoxide-binding pigment of liver microsomes. I. Evidence for its hemoprotein nature. *J Biol Chem* **239**: 2370–2378.

Omura, T., and Sato, R (1964b) The carbon monoxide-binding pigment of liver microsomes. II. Solubilization, purification, and properties. *J Biol Chem* **239**: 2379–2385.

## References

Peter R, Böcker R, Beaune PH, Iwasaki PH, Guengerich FP, and Yang CS (1990) Hydroxylation of chlorzoxazone as a specific probe for human liver cytochrome CYP2E1. *Chem Res Toxicol* **3**: 566-573.

Porrogi P, Kóbori L, Köhalmy K, Gulyás J, Vereczkey L, and Monostory K (2008) Limited applicability of 7-methoxy-4-trifluoromethylcoumarin as a CYP2C9-selective substrate. *Pharmacol Rep* **60**: 972-979.

Thorn CF (2012) PharmGKB summary: theophylline pathway. Pharmacogenetics and genomics. PMID: 22569204: PMCID: PMC3349446: DOI: 10.1097/FPC.0b013e32834aeedb <https://www.pharmgkb.org/pathway/PA165958541>. Accessed 12-20-2018.

Thorn CF, Whirl-Carrillo M, Leeder JS, Klein TE, and Altman RB (2012) PharmGKB summary: phenytoin pathway. Pharmacogenetics and genomics. PMID: 22569204: PMCID: PMC3349446: DOI: 10.1097/FPC.0b013e32834aeedb <https://www.pharmgkb.org/pathway/PA145011115>. Accessed 12-20-2018

Yamazaki H, Inoue K, Mimura M, Oda Y, Guengerich FP, and Shimada T (1996) 7-Ethoxycoumarin O-deethylation catalyzed by cytochromes CYP 1A2 and 2E1 in human liver microsomes. *Biochem Pharmacol* **51**: 313-319.

White BA and Bancroft FC (1982) Cytoplasmic dot hybridization. Simple analysis of relative mRNA levels in multiple small cell or tissue samples. *J Biol Chem* **257**: 8569-8572.
